CORRECTION

# Correction: Hydrophobic durability characteristics of butterfly wing surface after freezing cycles towards the design of nature inspired anti-icing surfaces

The *PLOS ONE* Staff

## Notice of Republication

An incorrect version of Fig 4 was published in error. This article was republished on February 6, 2018 to correct for this error. The publisher apologizes for the error. Please download this article again to view the correct version.

## Reference

1. Chen T, Cong Q, Qi Y, Jin J, Choy K-L (2018) Hydrophobic durability characteristics of butterfly wing surface after freezing cycles towards the design of nature inspired anti-icing surfaces. *PLoS ONE* 13 (1): e0188775. <https://doi.org/10.1371/journal.pone.0188775> PMID: 29385390

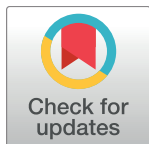

## OPEN ACCESS

**Citation:** The *PLOS ONE* Staff (2018) Correction: Hydrophobic durability characteristics of butterfly wing surface after freezing cycles towards the design of nature inspired anti-icing surfaces. *PLoS ONE* 13(3): e0194956. <https://doi.org/10.1371/journal.pone.0194956>

**Published:** March 21, 2018

**Copyright:** © 2018 The PLOS ONE Staff. This is an open access article distributed under the terms of the [Creative Commons Attribution License](https://creativecommons.org/licenses/by/4.0/), which permits unrestricted use, distribution, and reproduction in any medium, provided the original author and source are credited.
